# Supplementary material for: High sensitivity and rapid detection of hepatitis B virus DNA using lateral flow biosensors based on Au@Pt nanorods in the absence of hydrogen peroxide
Source: Royal Society of Chemistry journal article supplement (doi:10.1039/d1an02084f), 2021-12-21
Supplement: d1an02084f1.pdf [file d1an02084f1.pdf]

## *Electronic Supporting Information*

### **High sensitivity and rapid detection of Hepatitis B virus DNA using lateral flow biosensors based on Au@Pt nanorods in the absence of hydrogen peroxide**

Niu Li<sup>a</sup>, Xiaoxue Xi<sup>a</sup>, Junlun Zhu<sup>a</sup>, Xiaowei Wu<sup>b,\*</sup>, Xiuhua Zhang<sup>a</sup>, Shengfu Wang<sup>a</sup>, Wei Wen<sup>a,\*</sup>

<sup>a</sup> Collaborative Innovation Center for Advanced Organic Chemical Materials Co-constructed by the Province and Ministry, Ministry of Education Key Laboratory for the Synthesis and Application of Organic Functional Molecules, College of Chemistry and Chemical Engineering, Hubei University, Wuhan 430062, PR China

<sup>b</sup> Departemnt of Thoracic Surgery, Tongji Hospital, Tongji Medical Collage of Huazhong University of Science and Technology, Wuhan 430030, PR China

#### **\*Corresponding Authors:**

E-mail: Wei Wen, wenwei@hubu.edu.cn;

Xiaowei Wu, wuxiaowei119@126.com

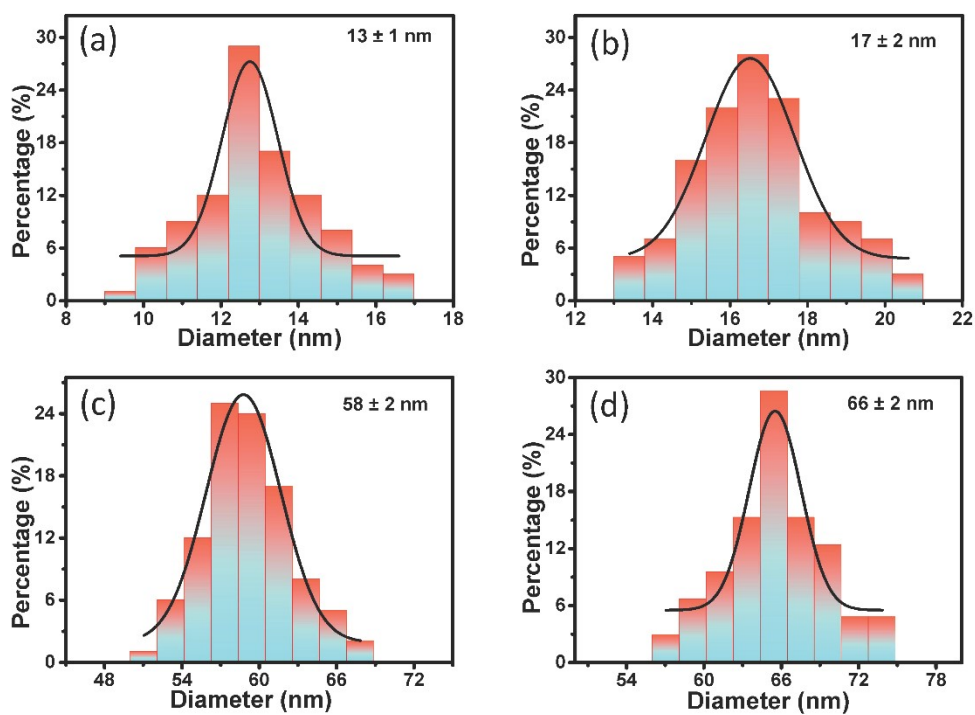

**Fig. S1** The width distribution diagram of the AuNRs (a) and Au@Pt nanorods (b); the length distribution diagram of the AuNRs (c) and Au@Pt nanorods (d).

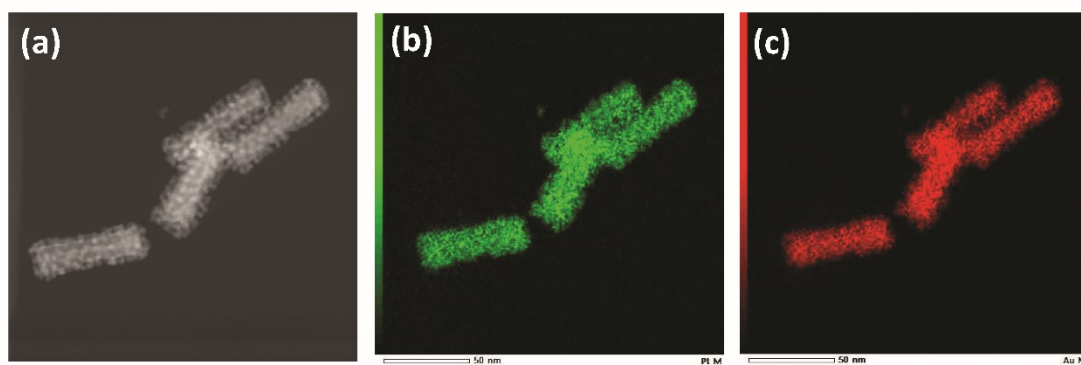

**Fig. S2** Elemental mapping images of Au@Pt nanorods: (a) Au@Pt; (b) Pt; (c) Au.

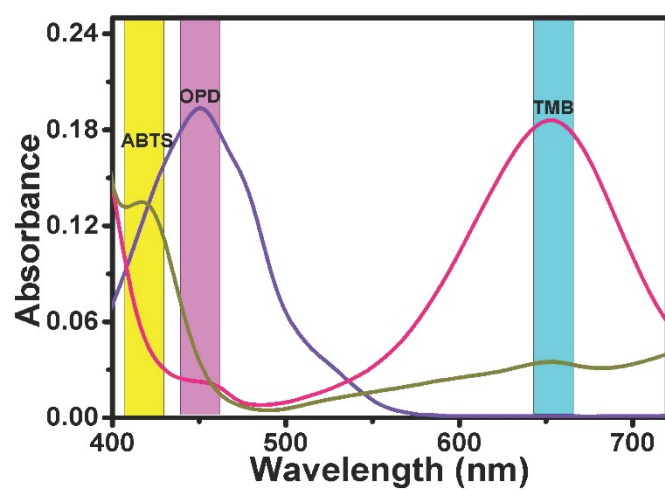

**Fig. S3** The UV-vis absorption spectrum of TMB, OPD and ABTS catalyzed by the Au@Pt nanorods.

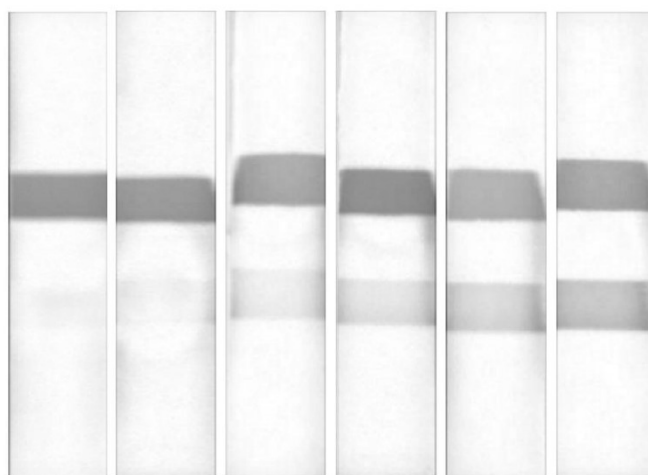

**Fig. S4** The physical map of lateral flow biosensors for the detection of HBV-DNA.

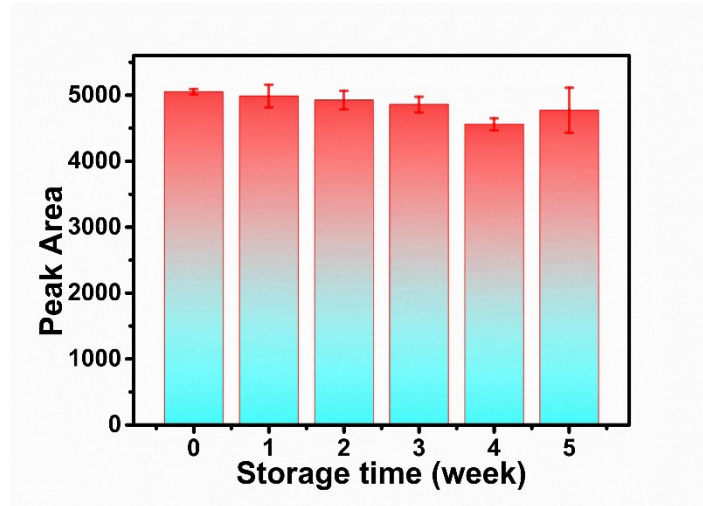

**Fig. S5** Effect of storage conditions on lateral flow biosensors for the detection of HBV-DNA.

**Table S1** Comparison of this work with other reported methods

| Method                  | Amplification                                 | Linear range | LOD     | Reference |
|-------------------------|-----------------------------------------------|--------------|---------|-----------|
| Electrochemical         | nanoporous gold electrode                     | 0.4 - 10 nM  | 10 pM   | 1         |
| Fluorescence signal     | Exonuclease III and silver nanoclusters probe | 4 - 625 nM   | 0.97 nM | 2         |
| Fluorescence biosensor  | hyperbranched rolling circle amplification    | 0.1 - 40 nM  | 0.05 nM | 3         |
| Lateral flow biosensors | enhanced oxidase-like activity                | 0.1 - 50 nM  | 8.5 pM  | This work |

**Table S2** Repeatability of multiple experiments in lateral flow biosensors.

| TargHBV<br>concentration<br>(nM) | Intra-assay       |                 |                     | Inter-assay       |                 |                     |
|----------------------------------|-------------------|-----------------|---------------------|-------------------|-----------------|---------------------|
|                                  | Mean <sup>a</sup> | SD <sup>b</sup> | CV <sup>c</sup> (%) | Mean <sup>a</sup> | SD <sup>b</sup> | CV <sup>c</sup> (%) |
| 0.2                              | 1139.01           | 117.54          | 10.32               | 1184.76           | 117.16          | 9.86                |
| 2                                | 4740.96           | 262.96          | 5.55                | 4665.13           | 95.73           | 2.05                |
| 20                               | 6058.11           | 134.15          | 2.21                | 6271.04           | 107.71          | 1.72                |

(a) Average value of signal intensity on parallel experimental test line (n=3); (b) standard deviation between parallel test experiments (n=3); (c) (the coefficient of variation)  $CV=SD/\text{mean}$ .



**Table S3** The sequences for the nucleic acids used in this work.

---

| Primer name           | Primer sequence (5'to3')                |
|-----------------------|-----------------------------------------|
| Probe DNA             | AAAAAAAAAATACCACATCATCCAT               |
| HBV-DNA               | TTGGCTTTCAGTTATATGGATGATGTGGT<br>A      |
| T-DNA                 | ATAACTGAAAGCCAA                         |
| C-DNA                 | ATGGATGATGTGGTA                         |
| Non-complementaryDNA1 | TGGAT TGCA ACTT ACGA CAAG CCGC<br>TTGTA |
| Non-complementaryDNA2 | TAATC CGTC AGAT ACCG GAAC CGGA<br>CCGAA |
| Non-complementaryDNA3 | TATAG CCGA CGGA CGGC CCGA GCAA<br>GCCAT |

---

**Table S4** Reliability of lateral flow biosensors in detecting HBV-DNA in serum samples.

| Sample number | Spiked Concentration (nM) | Measured Concentration (nM) | Recovery (%) |
|---------------|---------------------------|-----------------------------|--------------|
| 1             | 2                         | 1.80                        | 90.00        |
| 2             | 10                        | 10.35                       | 103.50       |
| 3             | 20                        | 17.38                       | 86.90        |

## References

1. L. E. Ahangar and M. A. Mehrgardi, *Bioelectrochemistry*, 2017, 117, 83-88.
2. Z. C. Liu, L. Zhang, Y. M. Zhang, R. P. liang and J. D. Qiu, *Sens. Actuators B Chem*, 2014, 205, 219-226.
3. X. H. Li, X. L. Zhang, J. Wu, N. Lin, W. M. Sun, M. Chen, Q. S. Ou and Z. Y. Lin, *Talanta*, 2019, 191, 277-282.
